1 **Assessment of pediatric surgical needs, health seeking behaviors and health systems in the**  
2 **rural district of Tando Mohammad Khan Sindh, Pakistan**

3 **Authors: Saqib Hamid Qazi<sup>1</sup>, Syed Saqlain Ali Meerza<sup>2</sup>, Reinou S. Groen<sup>3</sup>, Sohail Asghar Dogar<sup>1</sup>,**  
4 **Mushtaq Mirani<sup>2</sup>, Muhammad Khan Jamali<sup>2</sup>, Zahid Ali Khan<sup>2</sup>, Zahra Ali Padhani<sup>2</sup>, Rasool Bux<sup>4</sup>,**  
5 **Imran Ahmed Chahudary<sup>4</sup>, Arjumand Rizvi<sup>4</sup>, Saleem Islam<sup>5</sup>, Sadaf Khan<sup>6</sup>, Rizwan Haroon Ur**  
6 **Rashid<sup>7</sup>, Syed Akbar Abbas<sup>8</sup>, Abdul Sami Memon<sup>9</sup>, Sadia Tabassum<sup>10</sup>, Bukhtawar Dilawar<sup>1</sup>, Jai K**  
7 **Das<sup>2</sup>**

8 **Affiliations:**

9 <sup>1</sup>Section of Pediatric Surgery, Department of Surgery, Aga Khan University, Karachi, Pakistan  
10 <sup>2</sup> Institute for Global Health and Development, Aga Khan University, Karachi, Pakistan  
11 <sup>3</sup> Department of Obstetrics and Gynecology, Alaska Native Medical Center, Anchorage, Alaska  
12 <sup>4</sup> Division of Women and Child Health, Aga Khan University Hospital, Karachi, Pakistan  
13 <sup>5</sup> Department of Pediatric Surgery, University of Florida, Gainesville, United States of America  
14 <sup>6</sup> Department of Surgery, Aga Khan University, Karachi, Pakistan  
15 <sup>7</sup> Section of Orthopedic Surgery, Department of Surgery, Aga Khan University, Karachi, Pakistan  
16 <sup>8</sup> Section of Head and Neck Surgery, Department of Surgery Aga Khan University, Karachi, Pakistan  
17 <sup>9</sup> Department of Ophthalmology and Visual Sciences, Aga Khan University, Karachi, Pakistan  
18 <sup>10</sup> Section of Dermatology, Department of Medicine, Aga Khan University, Karachi, Pakistan

19 **Address correspondence to:** Dr Jai K. Das, Assistant Director, Institute for Global Health and  
20 Development, Aga Khan University, Karachi, Pakistan

21 **ABSTRACT**

22 **Background**

23 Surgical conditions are responsible for up to 15% of total DALY lost globally. Worldwide  
24 estimates have found that approximately 4.8 billion people have no access to surgical care. Within  
25 South Asia, greater than 95% of the population does not have access to care for conditions that  
26 require surgical management. Considering that greater than 50% of the population in the least  
27 developed regions worldwide is children, the surgical burden amongst children in LMICs is  
28 immense. In this study we use the SOSAS and PediPIPES in TMK district to assess the surgical  
29 needs of children under-5, quality of health facilities, and care seeking behavior in the community.

30 **Material and Methods**

31 The research was reviewed and approved by the Aga Khan University (AKU) Ethical Review  
32 Committee (ERC) and the National Bioethics Committee (NBC). Confidentiality of all collected

33 data was assigned high priority at each stage of data handling. Data was collected through the  
34 SOSAS and PediPIPES survey tools between November 2019 and February 2020 from a total of  
35 3,643 households in the TMK, Sindh, Pakistan. The SOSAS survey was conducted by research  
36 associates trained for data collection. Household mothers provided information about their  
37 children and data was recorded electronically. Health facilities were assessed using PediPIPES  
38 survey form. Information was collected on hard copies from all 39 health care facilities in the  
39 district, including RHCs, BHUs, DCDs, and DHQ. Data was collected by core team and entered  
40 onto an excel sheet.

## 41 **Results**

42 A total of 3,643 households participated and information of 6,371 children was collected. A total  
43 of 1,794 children were identified to have 3,072 lesions that required surgical attention. We  
44 categorized the lesions requiring surgical care according to six regions of the body. Head and neck  
45 accounted for the greatest number of lesions (n = 1,697) and the most significant unmet surgical  
46 need (16.6%). The chest region had 102 lesions and the least unmet surgical need of 5.9%. The  
47 back accounted for 87 lesions with an unmet surgical need of 6.9%. The abdomen had 493 lesions  
48 and an unmet surgical need of 13.4%. A total of 169 lesions were found on buttocks/groin/genitalia  
49 region with an unmet surgical need of 14.8%, while extremities presented with 296 lesions  
50 amounting to 11.8% unmet surgical need.

51 A total of 39 health facilities, consisting of one DHQ, three RHCs, 14 BHUs and 21 DCDs, were  
52 surveyed. Trained staff were only present at the DHQ. Basic procedures such as suturing, wound  
53 debridement, I&D were performed more commonly than the more complex procedures. Most  
54 hospitals were found to have a good availability of equipment and supplies. PediPIPES scores and

55 indices were calculated for the 39 health facilities in the area. The DHQ was found to have the  
56 highest score.

## 57 **Conclusions**

58 This study holds great significance for evaluation of pediatric surgical burden in Pakistan. It  
59 provides important insight into the burden of children's operative disease in Pakistan's rural  
60 district of TMK. The results show a significant need for provision of surgical care and has  
61 important implications for the global operative community as well as for strengthening the local  
62 health system in Pakistan. This data is useful preliminary evidence that emphasizes the need to  
63 further evaluate interventions for strengthening surgical systems in rural Pakistan.

## 64 **INTRODUCTION**

65 Surgical conditions are responsible for up to 15% of total disability adjusted life years (DALYs)  
66 lost globally (1). Worldwide estimates have found that approximately 4.8 billion people have no  
67 access to surgical care, and within South Asia, greater than 95% of the population does not have  
68 access to care for conditions that require surgical management (2). Considering that greater than  
69 50% of the population in the least developed regions worldwide is children, we can surmise that  
70 the surgical burden amongst children in LMICs is immense (3, 4). Currently, a large disproportion  
71 exists between the wealthiest and poorest third of the population globally, with the wealthy  
72 receiving a major share of 73.6% of surgical procedures and the poor receiving only 3.5% (5).  
73 Within poor countries, surgical services are concentrated almost wholly in cities and reserved  
74 largely for those who can pay for them (1). Until recently, pediatric surgical care in low and  
75 middle-income countries (LMICs) was largely overlooked, with global health attention primarily  
76 addressing communicable diseases, and maternal and infant mortality (5). However, improvement

77 of surgical care delivery for children is now being prioritized as a fundamental component of health  
78 care in LMICs (6). Improving surgical care delivery also has significant economic and welfare  
79 benefits for the population, as untreated surgical conditions increase medical costs, disability, and  
80 death (4). Hence, development of methods to enhance the quality of pediatric surgical and trauma  
81 care in low-resource regions can remarkably decrease childhood morbidity and mortality (7) and  
82 alleviate the associated financial and emotional stress.

83 To promote the development of LMIC health care delivery systems that includes pediatric surgical  
84 care, it is vital to understand the local burden of surgical disease in children, individual  
85 understanding of these disease pathologies, and the capacity of health care facilities to handle the  
86 burden of disease. It is crucial to understand the pediatric surgical health related behaviors of the  
87 community, as children lack the ability to express their health issues, and their health-related  
88 decisions are mostly handled by parents and families. Surveys completed at the community level  
89 provide a thorough measure of real-time surgical need (4). The Surgeons OverSeas Assessment of  
90 Surgical Need (SOSAS) survey has been the most frequently used population-based survey to  
91 estimate the surgical disease burden. It has previously been used in countries like Uganda, Rwanda,  
92 Nepal, and Sierra Leone (8-15). The Pediatric Personnel, Infrastructure, Procedure, Equipment,  
93 and Supplies (PediPIPES) survey tool is designed to assess pediatric surgical capacity. This survey  
94 originated as the World Health Organization (WHO) tool for situational analysis but was  
95 subsequently redesigned by Surgeons OverSeas (SOS) to include absolute numbers of hospital  
96 beds and operating rooms, a binary system of measurement to allow easier counting of items,  
97 removing reasons for not performing procedures, and restructuring of individual questions (16).

98 Pakistan, a South Asian country with a population of approximately 221 million people is an LMIC  
99 with a Gross National Income GNI per capita of \$1270 (17). Approximately 63% of the population

100 lives in rural areas (18). Several studies have been published describing childhood surgical  
101 emergencies in Pakistan. However, through a literature review, it was identified that no  
102 community-based survey tool has yet been employed to determine Pakistan's pediatric surgical  
103 disease burden in rural areas (19-21).

104 To better understand the ground reality of pediatric surgical disease burden in a low income region,  
105 keeping in mind the global trends of surgical care delivery depicted in past research, the objective  
106 of this study was to assess the burden of pediatric surgical disease, understand the local  
107 population's health seeking behavior, and analyze the health care set-up in Tando Mohammad  
108 Khan, a rural district in the Sindh province of Pakistan. Using the SOSAS and PediPIPES survey  
109 form, our results would serve as preliminary evidence towards the requirement to further  
110 strengthen pediatric surgical health care delivery in Pakistan and would lay the foundation for  
111 targeted approaches towards improving pediatric surgical health education and access to surgical  
112 care facilities.

## 113 **METHODOLOGY**

114 The survey was conducted in Tando Mohammad Khan district, Sindh over a period of three  
115 months, between 22<sup>nd</sup> November 2019 and 28<sup>th</sup> February 2020.

### 116 **Ethics Statement**

117 The research was reviewed and approved by the Aga Khan University (AKU) Ethical Review  
118 Committee (ERC) and the National Bioethics Committee (NBC). Confidentiality of all collected  
119 data was assigned high priority at each stage of data handling. The research participants were  
120 informed about the purpose, methods and benefits and intended uses of the research. Informed  
121 verbal consent was obtained. Respondents were free to stop interviews at any time or skip any

122 questions they did not want to answer. They had the right to ask questions at any point before,  
123 during or after the interview. All interviews were conducted by trained staff and in conditions of  
124 privacy. The respondents were informed about their rights. All data files were password-protected.

## 125 **Location**

126 Sindh is the second largest province by population (approximately six million people) after Punjab,  
127 and the third largest province of Pakistan by total area (22). Tando Mohammad Khan is one of the  
128 29 districts in Sindh with an area of 1,814 square kilometers (km<sup>2</sup>), overall population of 677,228  
129 and a population density of 373 people/km<sup>2</sup> (23)

## 130 **Survey Tools**

131 The SOSAS survey consists of two portions. The first section collects demographic details from  
132 the head of the household, including age and sex of household members, and number of deaths in  
133 the household within the past year. Household members are those living in the same physical  
134 structure. The second half of the survey gathers information from mothers on both current and  
135 previous surgical conditions categorized into six distinct anatomical regions: face, head, and neck;  
136 chest and breast; abdomen; groin, genitals, and buttocks; back; and arms, hands, legs, and feet.  
137 Mothers answer questions based on whether they perceive their children as ever having had a  
138 surgical condition in at least one of these anatomic regions. Additional questions cover the type of  
139 injury/accident, timing of the condition, and health seeking behavior, which includes the type of  
140 health care sought, type of health care received, and reasons why care was not accessed. The survey  
141 questions were translated into Sindhi, the primary language of Tando Mohammad Khan.

142 The PIPES survey assesses gaps in the availability of essential and emergency surgical care  
143 (EESC) at the district health facilities. The data items were divided into five sections: Personnel,

144 Infrastructure, Procedures, Equipment and Supplies (PIPES). This PediPIPES survey focuses on  
145 the capacity of health facilities to provide EESC to infants and children and has 118 total data  
146 items, compared to the 256 of the WHO tool.

#### 147 **Data collection**

148 Households in Tando Mohammad Khan districts were line-listed and a total of 3,643 eligible  
149 houses were randomized. The SOSAS survey was conducted by research associates who were  
150 trained for data collection and were monitored by senior managers. Verbal consent was obtained  
151 from the parents, and the surveys were administered in Sindhi. Mothers provided the survey  
152 information about their children below the age of five years. The information was recorded  
153 electronically via an application developed by the District Monitoring Unity (DMU).

154 Sindh's health facilities include primary and secondary healthcare facilities. A total of 1,782  
155 primary facilities in the province include rural health clinics (RHC), basic health units (BHU),  
156 dispensaries, Mother and Child health centers (MCH centers) amongst others (24). There are a  
157 total of 90 secondary healthcare facilities in Sindh including District Headquarter (DHQ) hospitals,  
158 Tehsil Headquarter (THQ) hospitals and other specialized secondary hospitals (25).

159 The PIPES survey data from all 39 health care facilities in Tando Mohammad Khan district, which  
160 included Rural Health Centers (RHC), Basic Health Units (BHU), District Council Dispensaries  
161 (DCD), and District Headquarter (DHQ) hospitals was collected by core team members which  
162 included a research coordinator and research specialist. The data was collected on hard copies and  
163 then entered onto an excel sheet.

164 Additionally, a total of 233 photographs were taken of children with lesions. These were reviewed  
165 by the relevant surgeons at the Aga Khan University Hospital for scoring and establishment of  
166 preliminary diagnoses.

## 167 **Data Analysis**

168 Current surgical need was defined as a self-reported surgical problem present at the time of the  
169 interview. Unmet surgical need was defined as a current surgical problem for which the respondent  
170 did not access care. Descriptive analysis was performed using STATA 16 (Stata Statistical Software:  
171 Release 16. College Station, TX: StataCorp LP).

## 172 **RESULTS**

173 A total of 3,643 households were surveyed for children's surgical needs in Tando Muhammad  
174 Khan (TMK), a rural district in Sindh, Pakistan. Most families in the area comprised of 2-3 people  
175 (84.8%). Of these households, 3,821 mothers filled the Surgeons Overseas Assessment of Surgical  
176 Need (SOSAS) survey form. Majority of the mothers' age ranged between 20-40 years (90.3%).  
177 Interviews with mothers identified a sum of 6,071 children in the area, with majority in the age  
178 range 1-5 years (n = 4,944, 81.4%). A near equal male (n = 3,063, 50.5%) to female ratio (n =  
179 3,008, 49.5%) was present.

## 180 **Burden**

### 181 *Deaths*

182 According to our survey, 290 of the 3,643 households reported death of a child in the last five  
183 years. Of these, 278 (95.9%) reported one death, 11 (3.8%) reported two deaths and only 1 (0.3%)  
184 reported a total of three deaths in the household. Overall, 300 child deaths were recorded, with



185 most occurring in the age range 1-12 months (79.3%), and a near equal occurrence in both genders  
186 [Male (56.9%) and Female (43.1%)]. A total of 109 (36.3%) deaths occurred due to surgical  
187 conditions, of which majority were reported to have occurred due to congenital deformity (n= 33,  
188 30.3%), a sum of 26 (23.9%) deaths occurred due to maternal bleeding or illness during birth, and  
189 22 (20.2%) experienced abdominal distension or pain. The remaining 191 children (63.7%) did  
190 not report an apparent surgical disease process as the cause of death. In 5 children (4.6%) death  
191 resulted from an injury or an accident, which included animal attacks or falls.

192 The majority of these children (n= 87, 79.8%) were taken to a health care facility [Private facility  
193 (67.8%) or Government facility (29.9%)] for treatment prior to death, while others received  
194 management at home (2.3%). Their treatment focused primarily on medical management (n = 84,  
195 96.6%). Only two patients (2.3%) underwent a major procedure and one (1.1%) had a minor  
196 procedure.

197 Most deaths were reported at home (n = 53, 48.6%) followed by health care facility (n = 46,  
198 42.2%). The most common reason identified for not taking the child to a health care facility was  
199 lack of time (child died before any arrangement could be made, n = 9, 40.9%). Other reasons  
200 included perception of the conditions to be non-surgical (n = 4, 18.2 %) and no money for health  
201 facility (n = 3, 13.6%). **(Table 1)**

**Table 1: Details about child deaths in the district**

|                                                    |                                                                                      |                                              |           |
|----------------------------------------------------|--------------------------------------------------------------------------------------|----------------------------------------------|-----------|
| Total households                                   |                                                                                      | 3,643                                        |           |
| Deaths in how many households in last 5 years      |                                                                                      | 290 (8%)                                     |           |
| Number of deaths per household                     | One                                                                                  | 278 (96%)                                    |           |
|                                                    | Two                                                                                  | 11 (3.8%)                                    |           |
| Total number of deaths                             |                                                                                      | 300                                          |           |
| Age at death                                       | 0-1 month                                                                            | 238 (79.3%)                                  |           |
|                                                    | 1-12 month                                                                           | 60 (20%)                                     |           |
|                                                    | 1-5 years                                                                            | 2 (0.7%)                                     |           |
| Gender of the child died                           | Male                                                                                 | 159 (53%)                                    |           |
|                                                    | Female                                                                               | 141 (47%)                                    |           |
| Total number of problems 1 week prior to deaths    |                                                                                      | 300                                          |           |
| Surgical Conditions                                |                                                                                      | 109 (36.3%)                                  |           |
| Types of Surgical conditions                       | Injury                                                                               | 2 (0.7%)                                     |           |
|                                                    | Wound not due to an injury                                                           | 7 (2.3%)                                     |           |
|                                                    | Bleeding or ill around childbirth                                                    | 26 (8.7%)                                    |           |
|                                                    | Mass (Growth or Swelling)                                                            | 15 (5.0%)                                    |           |
|                                                    | Deformity (Congenital)                                                               | 33 (11.0%)                                   |           |
|                                                    | Deformity (Acquired)                                                                 | 4 (1.3%)                                     |           |
|                                                    | Abdominal distention or pain                                                         | 22 (7.3%)                                    |           |
| Non-surgical conditions                            |                                                                                      | 191 (63.7%)                                  |           |
| Total number of children with surgical lesions     |                                                                                      | 109                                          |           |
| Children taken to Health care facility             | Yes                                                                                  | 87 (79.8%)                                   |           |
|                                                    | No                                                                                   | 22 (20.2%)                                   |           |
|                                                    | Reasons for not taking                                                               | No money for health care                     | 3 (13.6%) |
|                                                    |                                                                                      | No money for transportation                  | -         |
|                                                    |                                                                                      | No time (Died before arrangements)           | 9 (41%)   |
|                                                    |                                                                                      | Fear / No trust                              | 2 (9.1%)  |
|                                                    |                                                                                      | Not available (Facility/personnel/equipment) | 0         |
|                                                    |                                                                                      | No need (Condition is not surgical)          | 4 (18.2%) |
| Other                                              |                                                                                      | 4 (18.2%)                                    |           |
| Where were these conditions managed?               | At home                                                                              | 2 ( 2.3%)                                    |           |
|                                                    | Government health facility                                                           | 26 (29.9%)                                   |           |
|                                                    | Private health facility                                                              | 59 (67.8%)                                   |           |
|                                                    | NGO health facility                                                                  | 0                                            |           |
|                                                    | Hakeem/Traditional Healer                                                            | 0                                            |           |
| Type of treatment received for surgical conditions | None/No surgical care                                                                | 0                                            |           |
|                                                    | Only medical treatment                                                               | 84 (96.6%)                                   |           |
|                                                    | Major procedure ( <i>A procedure which requires regional or general anesthesia</i> ) | 2 ( 2.3%)                                    |           |
|                                                    | Minor procedure ( <i>Dressings, wound care, punctures, suturing and I&amp;D</i> )    | 1 ( 1.1%)                                    |           |
|                                                    | Manipulation / casting / sling                                                       | 0                                            |           |
|                                                    | Traction                                                                             | 0                                            |           |
| Place of death                                     | Home                                                                                 | 53 (48.6%)                                   |           |
|                                                    | Health Facility                                                                      | 46 (42.2%)                                   |           |
|                                                    | On the way to facility                                                               | 9 ( 8.3%)                                    |           |
|                                                    | Somewhere else                                                                       | 1 ( 0.9%)                                    |           |

203 *Lesions*

204 Of the 6,071 children included in the survey, a total of 1,794 (29.6%) children were identified to  
205 have or previously have had a total number of 3,072 lesions requiring surgical care, as some  
206 children were identified to have more than one type of lesion. Lesions were approximately equally  
207 distributed among males (n = 1,615, 52.6%) and females (n = 1,457, 47.4%). Majority of the  
208 children affected were in the age range of 1-5 years (90.6%). An overview of the lesions is  
209 presented in **Table 2**. Through a head-to-toe inquiry via the SOSAS survey form, head and neck  
210 region (Comprising of head, eye, ear, and neck) was found to be most commonly affected (n  
211 =1,697, 55.2%) followed by extremities (n = 524, 17.1%). By far, the most common lesions  
212 identified overall were non-injury related wounds (n = 1,154, 37.6%) followed by mass/growth (n  
213 = 417, 13.6%). In the majority of cases (n = 2,538, 82.5%), the lesions were not secondary to an  
214 accident. Amongst the remaining 17.5% children who suffered an accident, falls were found to be  
215 the most common cause of injury (n = 264, 49.1%) followed by hot object/ hot liquid related injury  
216 (n = 126, 23.4%).

217 **Table 2: Details of children with lesions**

|                                                |             |               |
|------------------------------------------------|-------------|---------------|
| Total number of children                       |             | 6071          |
| Total number of children with surgical lesions |             | 1794 (29.6%)  |
| Total number of surgical lesions               |             | 3072          |
| Age                                            | 0-1 month   | 5 (0.3%)      |
|                                                | 1-12 months | 192 (10.7%)   |
|                                                | 1-5 years   | 1,597 (89.0%) |
| Gender of the child                            | Male        | 939 (52.3%)   |
|                                                | Female      | 855 (47.7%)   |

218 *Head and neck*

219 A total of 1,697 lesions identified in this region. Of these 697 (41.1%) were present on the ears,  
220 383 (22.6%) on the head, 297 (17.5%) on the face, 204 (12%) in the eyes, and 116 (6.8%) lesions  
221 were on the neck. Lesions of the ear and face were mostly non-injury related, while the lesions on

222 the head and the neck were primarily a mass or growth. Congenital deformity was the most  
 223 common lesion of the eye. The majority of the head and neck lesions were not secondary to an  
 224 accident or an injury (n = 1,526, 90%). In the remaining 171 (10%) accident-related injuries, fall  
 225 (n = 106, 62%) was identified as the most common cause. The unmet surgical need was found to  
 226 be the highest in the head and neck region, contributing to 16.6% of the total lesions. **(Table 3a)**

227 **Table 3a: Lesions of head and neck**

| Region                   | Eyes       |            | Ears        |             | Face       |             | Head        |             | Neck       |            |
|--------------------------|------------|------------|-------------|-------------|------------|-------------|-------------|-------------|------------|------------|
|                          | Children   | Lesions    | Children    | Lesions     | Children   | Lesions     | Children    | Lesions     | Children   | Lesions    |
| Wound injury related     | 16 (8.2%)  | 18 (8.8%)  | 19 (3.6%)   | 20 (2.9%)   | 61 (22.1%) | 61 (20.5%)  | 57 (16.1%)  | 60 (15.7%)  | 7 (6.3%)   | 7 (6.0%)   |
| Wound not injury related | 64 (32.7%) | 69 (33.8%) | 453 (86.8%) | 616 (88.4%) | 98 (35.5%) | 111 (37.4%) | 123 (34.8%) | 135 (35.2%) | 42 (37.5%) | 42 (36.2%) |
| Burn                     | 2 (1.0%)   | 2 (1.0%)   | 0(0)        | 0(0)        | 14 (5.1%)  | 14 (4.7%)   | 2 (0.6%)    | 2 (0.5%)    | 2 (1.8%)   | 2 (1.7%)   |
| Mass or growth (solid)   | 11 (5.6%)  | 12 (5.9%)  | 21 (4.0%)   | 26 (3.7%)   | 81 (29.3%) | 88 (29.6%)  | 146 (41.4%) | 160 (41.8%) | 49 (43.8%) | 53 (45.7%) |
| Deformity congenital     | 80 (40.8%) | 80 (39.2%) | 20 (3.8%)   | 25 (3.6%)   | 11 (4.0%)  | 11 (3.7%)   | 13 (3.7%)   | 13 (3.4%)   | 5 (4.5%)   | 5 (4.3%)   |
| Deformity acquired       | 10 (5.1%)  | 10 (4.9%)  | 6 (1.1%)    | 6 (0.9%)    | 11 (4.0%)  | 12 (4.0%)   | 12 (3.4%)   | 13 (3.4%)   | 7 (6.3%)   | 7 (6.0%)   |
| Blindness                | 1 (0.5%)   | 1 (0.5%)   | 0(0)        | 0(0)        | 0(0)       | 0(0)        | 0(0)        | 0(0)        | 0(0)       | 0(0)       |
| Reduced Vision           | 12 (6.1%)  | 12 (5.9%)  | 0(0)        | 0(0)        | 0(0)       | 0(0)        | 0(0)        | 0(0)        | 0(0)       | 0(0)       |
| Hearing loss             | 0(0)       | 0 (0)      | 3 (0.6%)    | 4 (0.6%)    | 0(0)       | 0(0)        | 0(0)        | 0(0)        | 0(0)       | 0(0)       |

228 *Chest*

229 In the 102 lesions identified on the chest, 24 (23.5%) comprised of a mass or growth, closely  
 230 followed by 21 (20.6%) non-injury related wounds. Most lesions were not secondary to an accident  
 231 (n = 83, 81.4%) but amongst the remaining 19 (18.6%) that occurred following an accident, falls

232 were identified as one of the main reasons (n = 10, 52.6%). The unmet surgical need of lesions on  
233 the chest was found to be the lowest, amounting to only 5.9%.

#### 234 *Back*

235 We identified 87 lesions on the back, of which approximately half consisted of mass or growth (n  
236 = 44, 50.6%). Only 12 (13.8%) lesions were reported to have started after an injury/accident, while  
237 the remaining 75 (86.2%) lesions were not secondary to an accident. In 12 injury related wounds,  
238 burns from hot liquid or object were seen as the most common cause (n = 5, 41.7%). The unmet  
239 surgical needs for the lesions on the back was found to be 6.9%.

#### 240 *Abdomen*

241 In the 493 abdominal problems noted, the majority consisted of a child unable to urinate (236,  
242 47.9%) followed by abdominal distention or pain (n = 116, 34.1%). A total of 481 (97.6%) lesions  
243 were not preceded by an accident. Wounds secondary to an accident mostly resulted from burns  
244 with hot objects (n = 5, 41.7%). The unmet surgical need for the abdominal lesions was 13.4%.

#### 245 *Buttocks/ Groin/ Genitalia*

246 In a total of 169 lesions identified, the majority consisted of wounds that did not result from an  
247 injury (n = 46, 27.2%) followed by a solid mass or growth (n = 36, 21.3%). A sum of 19 lesions  
248 resulted from an accident or injury, with hot object burns (n = 8, 42.1) accounting for most,  
249 followed by fall (n = 4), animal attack (n = 3) or open fire explosion (n = 3). One child reported a  
250 stab/slash/crush related injury. The unmet surgical need for the lesions on the  
251 buttocks/groin/genitalia was found to be 14.8%. Details of lesions of chest, back, abdomen and  
252 buttock / groin / genitalia are available in **Table 3b**.

253

**Table 3b: Lesions of chest, back, abdomen, buttocks/groin/genitalia**

| Region                       | Chest      |            | Back       |            | Abdomen     |             | Buttocks/Groin/Genitalia |            |
|------------------------------|------------|------------|------------|------------|-------------|-------------|--------------------------|------------|
|                              | Children   | Lesions    | Children   | Lesions    | Children    | Lesions     | Children                 | Lesions    |
| Wound injury related         | 6 (6.0%)   | 6 (5.9%)   | 2 (2.6%)   | 2 (2.3%)   | 2 (0.5%)    | 2 (0.4%)    | 4 (2.5%)                 | 4 (2.4%)   |
| Wound not injury related     | 20 (20.0%) | 21 (20.6%) | 23 (29.5%) | 25 (28.7%) | 14 (3.2%)   | 16 (3.2%)   | 43 (26.7%)               | 46 (27.2%) |
| Burn                         | 4 (4.0%)   | 4 (3.9%)   | 7 (9.0%)   | 7 (8.0%)   | 7 (1.6%)    | 7 (1.4%)    | 13 (8.1%)                | 13 (7.7%)  |
| Mass or growth (solid)       | 23 (23.0%) | 24 (23.5%) | 37 (47.4%) | 44 (50.6%) | 10 (2.3%)   | 10 (2.0%)   | 32 (19.9%)               | 36 (21.3%) |
| Mass or growth (reducible)   | 0(0)       | 0(0)       | 0(0)       | 0(0)       | 16 (3.7%)   | 16 (3.2%)   | 14 (8.7%)                | 14 (8.3%)  |
| Deformity congenital         | 13 (13.0%) | 13 (12.7%) | 5 (6.4%)   | 5 (5.7%)   | 14 (3.2%)   | 15 (3.0%)   | 16 (9.9%)                | 16 (9.5%)  |
| Deformity acquired           | 8 (8.0%)   | 8 (7.8%)   | 4 (5.1%)   | 4 (4.6%)   | 4 (0.9%)    | 4 (0.8%)    | 4 (2.5%)                 | 4 (2.4%)   |
| Foreign body                 | 13 (13.0%) | 13 (12.7%) | 0(0)       | 0(0)       | 0(0)        | 0(0)        | 0(0)                     | 0(0)       |
| Cardiac (congenital)         | 13 (13.0%) | 13 (12.7%) | 0(0)       | 0(0)       | 3 (0.7%)    | 3 (0.6%)    | 0(0)                     | 0(0)       |
| Abdominal distention or pain | 0(0)       | 0(0)       | 0(0)       | 0(0)       | 105 (24.0%) | 116 (23.5%) | 0(0)                     | 0(0)       |
| Inability to urinate         | 0(0)       | 0(0)       | 0(0)       | 0(0)       | 202 (46.2%) | 236 (47.9%) | 0(0)                     | 0(0)       |
| Renal stone                  | 0(0)       | 0(0)       | 0(0)       | 0(0)       | 20 (4.6%)   | 20 (4.1%)   | 0(0)                     | 0(0)       |
| Bleeding (per rectum)        | 0(0)       | 0(0)       | 0(0)       | 0(0)       | 36 (8.2%)   | 41 (8.3%)   | 0(0)                     | 0(0)       |
| Bleeding (per penis)         | 0(0)       | 0 (0)      | 0(0)       | 0(0)       | 4 (0.9%)    | 7 (1.4%)    | 16 (9.9%)                | 17 (10.1%) |

254 *Extremities*

255 In the 296 lesions on the upper limb, proximally to distally 13.9% were on the upper arm, 41.9%  
 256 on the lower arm, 21.3% on the thumb and hands and 23% were on the fingers. Majority lesions

257 of the upper arm (34.1%), lower arm (40.3%) and thumb (34.9%) were due to acquired deformities,  
258 while fingers were most affected by burns (47.1%). The upper limb lesions were mostly due to an  
259 injury or accident (n = 204, 68.9%). Of the lesions secondary to injury, falls were the primary  
260 cause in the upper arm, lower arm, and hand/thumb, whereas for fingers hot object related burns  
261 accounted for the highest percentage of the total lesions.

262 Overall, 228 (9.3%) lesions were found on lower limbs. Proximally to distally, lesions were  
263 distributed as follows; upper leg (n = 46, 20.2%), lower leg (n = 52, 22.8%) and feet (n = 130,  
264 57%). Lesions of the upper legs were mainly deformities, both congenital (n = 11) and acquired  
265 (n = 9), while the lower legs were mostly affected by abnormal growths (n = 15, 28.8%), and burns  
266 were the most frequently occurring lesions of the feet (n = 37, 28.7%).

267 The total unmet surgical need for the combined upper and lower limb lesions was found to be  
268 11.8%. Further details about lesion on extremities is shown in **Table 3C**.

**Table 3c: Lesions on Extremities**

| Region                           | Fingers       |               | Thumb/<br>Hand |               | Upper<br>arm  |               | Lower<br>arm |               | Upper leg     |               | Lower leg     |               | Foot          |               |
|----------------------------------|---------------|---------------|----------------|---------------|---------------|---------------|--------------|---------------|---------------|---------------|---------------|---------------|---------------|---------------|
|                                  | Children      | Lesions       | Children       | Lesions       | Children      | Lesions       | Children     | Lesions       | Children      | Lesions       | Children      | Lesions       | Children      | Lesions       |
| What Problem he/she had          |               |               |                |               |               |               |              |               |               |               |               |               |               |               |
| Wound injury related             | 9<br>(13.8%)  | 10<br>(14.7%) | 5 (8.3%)       | 5 (7.9%)      | 9<br>(25.7%)  | 10<br>(24.4%) | 22 (20.8%)   | 23<br>(18.5%) | 5<br>(11.1%)  | 5<br>(10.9%)  | 4 (8.5%)      | 4 (7.7%)      | 15<br>(12.1%) | 16<br>(12.3%) |
| Wound not injury related         | 5 (7.7%)      | 5 (7.4%)      | 8<br>(13.3%)   | 9<br>(14.3%)  | 7<br>(20.0%)  | 11<br>(26.8%) | 9 (8.5%)     | 14<br>(11.3%) | 7<br>(15.6%)  | 7<br>(15.2%)  | 12<br>(25.5%) | 14<br>(26.9%) | 13<br>(10.5%) | 13<br>(10.0%) |
| Burn                             | 31<br>(47.7%) | 32<br>(47.1%) | 17<br>(28.3%)  | 17<br>(27.0%) | 3 (8.6%)      | 3 (7.3%)      | 20 (18.9%)   | 20<br>(16.1%) | 7<br>(15.6%)  | 8<br>(17.4%)  | 4 (8.5%)      | 4 (7.7%)      | 36<br>(29.0%) | 37<br>(28.5%) |
| Mass or growth (solid)           | 4 (6.2%)      | 4 (5.9%)      | 5 (8.3%)       | 5 (7.9%)      | 3 (8.6%)      | 3 (7.3%)      | 11 (10.4%)   | 12<br>(9.7%)  | 6<br>(13.3%)  | 6<br>(13.0%)  | 13<br>(27.7%) | 15<br>(28.8%) | 15<br>(12.1%) | 18<br>(13.8%) |
| Deformity congenital             | 4 (6.2%)      | 4 (5.9%)      | 5 (8.3%)       | 5 (7.9%)      | 0(0)          | 0(0)          | 4 (3.8%)     | 4 (3.2%)      | 11<br>(24.4%) | 11<br>(23.9%) | 5<br>(10.6%)  | 5 (9.6%)      | 24<br>(19.4%) | 25<br>(19.2%) |
| Deformity acquired               | 12<br>(18.5%) | 13<br>(19.1%) | 20<br>(33.3%)  | 22<br>(34.9%) | 13<br>(37.1%) | 14<br>(34.1%) | 39 (36.8%)   | 50<br>(40.3%) | 9<br>(20.0%)  | 9<br>(19.6%)  | 9<br>(19.1%)  | 10<br>(19.2%) | 20<br>(16.1%) | 20<br>(15.4%) |
| (Recurrent) drainage / discharge | 0(0)          | 0(0)          | 0(0)           | 0(0)          | 0(0)          | 0(0)          | 1 (0.9%)     | 1 (0.8%)      | 0(0)          | 0(0)          | 0(0)          | 0(0)          | 1 (0.8%)      | 1 (0.8%)      |



271 *Photographs*

272 A sum of 233 photographs were taken of children with lesions. These pictures were shared with  
273 surgeons at the Aga Khan University Hospital for scoring and obtaining preliminary diagnoses via  
274 interdepartmental collaboration of multiple surgery faculty members. Majority of the pictures were  
275 of children with lesions on the head and neck region, followed by extremities and least from  
276 children with lesions on the back. More information about the diagnosis can be found in **Appendix**  
277 **1**.

278 **Health Seeking Behavior**

279 A large percentage of the lesions (n = 2,632, 85.7%) were managed at a health care facility, ranging  
280 from private (52.4%), government (33.8%) and NGO based setup (0.2%), while the remaining  
281 7.8% lesions were managed at home, or by a Hakeem/traditional healer (5.9%). Treatment  
282 essentially consisted of only medical management (n = 2,289, 87%). Surgical treatment was only  
283 received for 291 (11%) lesions, which included minor procedures, major procedures, traction and  
284 manipulation /casting /sling. Fifty-two (2%) lesions did not receive any care. **Table 4** shows a  
285 more detailed picture of the health seeking behavior.

286 The perception of the condition being non-surgical (n = 215, 48.9%) and an inability to afford  
287 health care (n = 135, 30.7%) were found to be the major reasons for parents not taking their  
288 children to a health facility. The data depicts that a vast majority of the conditions reported were  
289 not disabling for the children (n = 2,900, 88.6%). A few children reported needing help with  
290 transportation (3.5%), needing help with daily living (3.1%), feeling ashamed of their condition  
291 (2.6%), and not being able to work the way they were previously able to (2%).

292

**Table 4: Lesion management and impact**

|                                                                   |                                                                                      |                                              |             |
|-------------------------------------------------------------------|--------------------------------------------------------------------------------------|----------------------------------------------|-------------|
| Total number of children with surgical conditions                 |                                                                                      | 1794                                         |             |
| Total number of surgical conditions                               |                                                                                      | 3072                                         |             |
| lesion managed at Health care facility                            | Yes                                                                                  | 2632 (85.7%)                                 |             |
|                                                                   | No                                                                                   | 440 (14.3%)                                  |             |
|                                                                   | Reasons for not visiting health facility                                             | No money for health care                     | 135 (30.7%) |
|                                                                   |                                                                                      | No money for transportation                  | 22 (5.0%)   |
|                                                                   |                                                                                      | No time (Died before arrangements)           | 0 (0)       |
|                                                                   |                                                                                      | Fear / No trust                              | 36 (8.2%)   |
|                                                                   |                                                                                      | Not available (Facility/personnel/equipment) | 9 (2.0)     |
|                                                                   |                                                                                      | No need (Condition is not surgical)          | 215 (48.9%) |
| Other                                                             |                                                                                      | 23 (5.2%)                                    |             |
| Where were these conditions managed?                              | At home                                                                              | 204 (7.8%)                                   |             |
|                                                                   | Government health facility                                                           | 889 (33.8%)                                  |             |
|                                                                   | Private health facility                                                              | 1,379 (52.4%)                                |             |
|                                                                   | NGO health facility                                                                  | 4 (0.2%)                                     |             |
|                                                                   | Hakeem/Traditional Healer                                                            | 156 (5.9%)                                   |             |
| Type of treatment received for surgical conditions                | None/No surgical care                                                                | 52 ( 2.0%)                                   |             |
|                                                                   | Only medical treatment                                                               | 2,289 (87.0%)                                |             |
|                                                                   | Major procedure ( <i>A procedure which requires regional or general anesthesia</i> ) | 22 ( 0.8%)                                   |             |
|                                                                   | Minor procedure ( <i>Dressings, wound care, punctures, suturing and I&amp;D</i> )    | 121 ( 4.6%)                                  |             |
|                                                                   | Manipulation / casting / sling                                                       | 70 ( 2.7%)                                   |             |
|                                                                   | Traction                                                                             | 78 ( 3.0%)                                   |             |
| Does this problem (Disability) still impact on child's daily life | The condition is not disabling                                                       | 2,900 (94.4%)                                |             |
|                                                                   | He/she feels ashamed                                                                 | 87 (2.8%)                                    |             |
|                                                                   | He/she not able to work like he/she used to                                          | 67 (2.2%)                                    |             |
|                                                                   | He/she needs help with transportation                                                | 116 (3.8%)                                   |             |
|                                                                   | He/she needs help with daily living                                                  | 103 (3.4%)                                   |             |

293 **Health Facility Assessment**

294 A total of 39 health facilities were identified and surveyed in the TMK district. They consisted of  
 295 one District Headquarter Hospital (DHQ), three Rural Health Clinics (RHC), 14 Basic Health  
 296 Units (BHU) and 21 District Council Dispensaries (DCD). These facilities were assessed using  
 297 Pediatrics Personnel, Infrastructure, Procedures, Equipment and Supplies (Pedi PIPES) survey  
 298 form.

299 *Personnel*

300 Trained staff was only identified to be present at the DHQ; the staff present comprised of three  
301 anesthesiologists, two pediatricians with two pediatric trained nurses and one general surgeon.  
302 There were no nurse anesthetists. No pediatric surgeon or a medical doctor able to operate on  
303 children was available.

304 *Infrastructure*

305 The facilities comprised of 197 beds of which 22 were allocated for pediatric patients. All 39  
306 facilities had an electricity supply (external source or generator). Other infrastructure  
307 components that were present in most of the facilities included running water and medical  
308 records. Laboratories to test blood and urine were available in 89.7% of the facilities surveyed. A  
309 very small proportion of the hospitals were found to have incinerators (23.1%), ultrasonography  
310 (20.5%), plain radiography (12.8%), post-operative care area (12.8%), an emergency department  
311 (10.3%) and special care baby unit (10.3%). Less than 10% of the hospitals had operating rooms  
312 (7.7%), blood banks (2.6%) and pediatric ventilators (2.6%). None of the facilities had a neonatal  
313 or general intensive care unit (ICU), a newborn incubator, or a computed tomography (CT) scan  
314 machine. Details have been mentioned in **Table 5**.

315

**Table 5: Infrastructure items**

316

| Infrastructure items                       | No. (%) * |
|--------------------------------------------|-----------|
| Operating room                             | 3 (7.7)   |
| Laboratory (blood and urine)               | 35 (89.7) |
| Medical records                            | 38 (97.4) |
| Emergency department                       | 4 (10.3)  |
| Newborn incubator                          | 0 (0)     |
| Postoperative care area                    | 5 (12.8)  |
| Blood bank                                 | 1 (2.6)   |
| Plain radiography                          | 5 (12.8)  |
| Ultrasonography                            | 8 (20.5)  |
| Special Care Baby Unit                     | 4 (10.3)  |
| Electricity (external source or generator) | 39 (100)  |
| Incinerator                                | 9 (23.1)  |
| Running water                              | 38 (97.4) |
| NICU or General ICU                        | 0 (0)     |
| Pediatric ventilator                       | 1 (2.6)   |
| Computed tomography                        | 0 (0)     |

317

318

319

320

321

322

323 *Procedures*

324 At the time of the survey, 14 different types of procedures were being performed at the health

325 facilities. Basic and less intricate procedures were performed more than the complex procedures.

326 Suturing (94.9%), wound debridement (94.9%) and incision and drainage of abscess (82.1%) were

327 frequently performed. Less commonly performed procedures included resuscitation (20.5%), burn

328 management (10.3%), traction of closed fracture (2.6%), casting of fracture (2.6%), pediatric

329 hernia repair (2.6%), ovarian cystectomy (2.6%), appendectomy (2.6%) and spinal/ general/

330 ketamine induced anesthesia (2.6%) each. Details available in **Table 6**

331

**Table 6: Procedures**

| Anesthesia<br>No. (%) | Respiratory<br>No. (%)             | Gastrointestinal<br>No. (%) | Urogenital<br>No. (%)                 | Orthopedic<br>No. (%)                     | Unclassified<br>No. (%)           |
|-----------------------|------------------------------------|-----------------------------|---------------------------------------|-------------------------------------------|-----------------------------------|
| Ketamine<br>1 (2.6)   | Chest tube<br>insertion<br>1 (2.5) | Appendectomy<br>1 (2.6)     | Pediatric<br>hernia repair<br>1 (2.6) | Traction of<br>closed fracture<br>1 (2.6) | Resuscitation<br>8 (20.5)         |
| General<br>1 (2.6)    |                                    |                             | Ovarian<br>cystectomy<br>1 (2.6)      | Casting of<br>fracture<br>1 (2.6)         | Suturing<br>37 (94.9)             |
| Spinal<br>1 (2.6)     |                                    |                             |                                       |                                           | Wound<br>debridement<br>37 (94.9) |
|                       |                                    |                             |                                       |                                           | I&D of<br>abscess<br>32 (82.1)    |
|                       |                                    |                             |                                       |                                           | Burn<br>management<br>4 (10.3)    |

332 *Equipment and Supplies*

333 Most hospitals had an appropriate availability of equipment. We found more than 90% of the  
334 hospitals had a supply of examination gloves, aprons, adhesive tape, thermometers, stethoscopes,  
335 infant weighing scale, syringes, intravenous cannulas, oxygen mask and tubing, compressed  
336 oxygen, tourniquet, sterile gloves/gauze, facemask, pulse oximeter and gowns for surgeon/scrub  
337 nurse. Other items that were present in more than half of the facilities included kidney-dishes,  
338 sterilizers, disposable needles, theater shoes, absorbable and non-absorbable sutures, oxygen  
339 concentrators, 12 F or smaller nasogastric tubes, pediatric blood pressure cuff, intravenous fluid  
340 infusion set and manual or electric suction pumps. Apnea monitors were not available at any of  
341 the hospitals. The availability of anesthesia machines, operating room lights, electrocautery  
342 machine, scalpel blades, syringe pumps, and sterile drapes was notably low, while laparoscopic  
343 surgery supplies, chest tubes, neonatal T-piece and endoscopes were unavailable in all 39 facilities.  
344 Details available in **Table 7** and **Table 8**

345

**Table 7: Equipment's**

| <b>Equipment</b>                                    | <b>No. (%)</b> |
|-----------------------------------------------------|----------------|
| Thermometer                                         | 38 (97.4)      |
| Stethoscope                                         | 38 (97.4)      |
| Endotracheal tube (pediatric)                       | 5 (12.8)       |
| Weighing scale (infant)                             | 38 (97.4)      |
| Oropharyngeal airway (pediatric)                    | 7 (17.9)       |
| Anesthesia machine                                  | 2 (5.1)        |
| Kidney dish                                         | 35 (89.7)      |
| Sterilizer (autoclave)                              | 32 (82.1)      |
| Oxygen mask and tubing                              | 38 (97.4)      |
| Suction pump (manual or electric)                   | 24 (61.5)      |
| Operating room light                                | 4 (10.3)       |
| Surgical instrument set (abdominal)                 | 5 (12.8)       |
| Electrocautery machine                              | 1 (2.6)        |
| Compressed oxygen in cylinder                       | 38 (97.4)      |
| Bag-valve mask (pediatric)                          | 19 (48.7)      |
| Pulse oximeter                                      | 37 (94.9)      |
| Oxygen concentrator                                 | 31 (79.4)      |
| Blood pressure measuring equipment (pediatric cuff) | 20 (51.3)      |
| Neonatal T-piece                                    | 0 (0)          |
| Endoscope (esophagoscope/ bronchoscope/ cystoscope) | 0 (0)          |
| Syringe pumps                                       | 2 (5.1)        |
| Apnea alarm detector/apnea monitor                  | 0 (0)          |

346

347

**Table 8: Supplies**

| Supplies                                 | No. (%)   |
|------------------------------------------|-----------|
| Gloves (sterile)                         | 36 (92.3) |
| Gloves (examination)                     | 39 (100)  |
| Nasogastric tubes 12F or smaller         | 20 (51.3) |
| Intravenous fluid infusion sets          | 24 (61.5) |
| Blood transfusion sets                   | 10 (25.6) |
| IV cannulas                              | 38 (97.4) |
| Syringes                                 | 38 (97.4) |
| Disposable needles                       | 32 (82.1) |
| Tourniquet                               | 38 (97.4) |
| Sterile gauze                            | 37 (94.9) |
| Bandages sterile                         | 37 (94.9) |
| Adhesive Tape                            | 39 (100)  |
| Suture (absorbable)                      | 30 (76.9) |
| Suture (non-absorbable)                  | 34 (87.2) |
| Urinary catheters (must include 6F)      | 8 (20.5)  |
| Sharps disposal container                | 4 (10.3)  |
| Face masks                               | 37 (94.9) |
| Eye protection (goggles, safety glasses) | 11 (28.2) |
| Apron                                    | 39 (100)  |
| Boots (theatre shoes)                    | 34 (87.2) |
| Gowns (for surgeon/scrub nurse)          | 36 (92.3) |
| Drapes (for operations)                  | 1 (2.6)   |

348

349 *PediPIPES scores and indices*

350 PediPIPES personnel, infrastructure, procedures, equipment, and supplies score were calculated.  
351 The hospital with the highest PediPIPES indices in Tando Mohammad Khan had the following:  
352 Personnel score 8, infrastructure score 9, procedure score 12, equipment score 17 and supplies  
353 score of 21.

## 355 **DISCUSSION**

356 SOSAS was primarily developed to measure surgical disease burden in low- and middle-income  
357 countries (10). From the time of its creation and first use, SOSAS has become a validated tool to  
358 assess a vast range of surgically treatable conditions at the population level (10, 11, 14). This  
359 execution of the SOSAS and PediPIPES survey in the rural district of Tando Mohammad Khan is  
360 the first of its nature in Pakistan. The primary aim of this study was to lay out an introductory  
361 population-based data on the burden of surgical disease in the rural areas of Pakistan, which will  
362 contribute to our comprehension of the epidemiology of surgical diseases in LMICs.

363 Of the reported child death in the last five years in Tando Mohammad Khan, 36.3% of the deaths  
364 were due to lesions that required surgical attention. The majority of children (approximately 80%)  
365 were taken to a health care facility (private more frequently than public facilities), but only 3.4%  
366 children received surgical care. This identifies a high unmet surgical need in the region. A large  
367 proportion of children with surgical lesions were taken to a health care facility for management,  
368 but only a small fraction (11%) were surgically managed, while the majority (87%) received only  
369 medical management. On assessment of why children with surgical lesions were not taken to a  
370 health facility, it was found that a high proportion of the population did not perceive the condition



371 as requiring surgical management. The next most frequent reason for not seeking care was the  
372 inability to afford health care.

373 Health facility assessment done through PediPIPES identified that only one facility in Tando  
374 Mohammad Khan had trained staff, comprising of anesthesiologists, pediatricians, nurses and one  
375 general surgeon. This identifies a lack of skilled personnel available to cater to the surgical need  
376 of children in the area. Amongst the total 39 facilities in the area, only 22 paediatric beds were  
377 available. These facilities had the capacity to perform only basic procedures such as suturing,  
378 wound debridement and incision and drainage.

379 Until recently, global health attention was mainly focused on addressing communicable diseases  
380 and maternal and child mortality in LIC and LMIC (5). In contrast, this study highlights the  
381 significant surgical burden that exists and the importance of developing a health care structure to  
382 manage it. Compared to other LMICs (11, 12, 14, 15, 26) the rates of current and unmet surgical  
383 need in Tando Mohammad Khan are high. Pakistan currently faces a challenge of inadequate  
384 surgical care delivery to children (27). According to the World Bank 2019 data, within South Asia,  
385 India was reported to have a lower number of physicians per 1000 individuals compared to  
386 Pakistan (0.7 vs. 1.1) (28). However, in correlation to the SOSAS study conducted in 2019 by  
387 Cherukupalli et al. (5), the unmet surgical need in rural India was reported to be 6.5%, which is  
388 much lower than a staggering 14.3% in Pakistan as identified in this study.

389 Access to surgical care could be addressed with the continuing development of surgical capacity  
390 at lower-level facilities, improving referral systems, and surgical training of non-physicians.  
391 Malawi, Mozambique and other countries have invested in training of non-physicians in surgery.  
392 However only a small fraction of the need can be dealt with in this fashion (29). In addition to  
393 health facility capacity development, community-based educational programs for strengthening

394 pre-hospital systems are vital (5). The implementation of first responder courses (30) in Tando  
395 Mohammad Khan could train lay-people to perform initial stabilization and transportation of the  
396 injured to a higher level of care. Such programs have been shown to reduce mortality and  
397 physiological severity scores in trauma patients, and can improve pre-hospital infrastructure by  
398 empowering community members with basic emergency and trauma care skills (30). Health  
399 service delivery may be greatly improved through a simple reorganization of services without any  
400 cost. For example, this can be demonstrated by the essential trauma-care guidelines and their use  
401 as needs assessment tools in multiple countries (31). Increasing the availability of medications,  
402 equipment, supplies, and banked blood at the primary and secondary health care centers are  
403 essential steps as well (4, 32). This allows adequate care for basic surgical problems at lower-level  
404 hospitals, whilst also providing an opportunity to stabilize more critically ill patients prior to being  
405 transported to a tertiary care center for more complex procedures.

406 This study has some potential limitations. One significant limitation is in-built in the survey's  
407 definition of operative conditions. All operative conditions in this survey relied upon participants'  
408 self-reported conditions in the verbal interview. Thus, the conditions identified through this survey  
409 serve as proxies in estimating operative disease prevalence. This may overestimate some  
410 conditions, which may require follow up rather than surgical intervention. This survey also does  
411 not determine conditions such as cancers, which could require surgical care, thus underestimating  
412 the true surgical burden of disease. Despite these limitations, surgical conditions recognized by  
413 SOSAS provide an initial estimate of need for surgical consultations.

414 After the success of an initial survey in rural district of Pakistan, the next step will be to perform  
415 a larger countrywide survey in Pakistan with an aim to compare the burden of surgical conditions  
416 in urban and rural regions. We also need to explore the differences in community's approach to

417 health seeking and the treatment options available. The successful implementation of photographs  
418 taken on-site and using them to determine a diagnosis with the help of physicians from different  
419 sub-specialties can be followed up by incorporation of a physical exam performed by a local  
420 physician for further validation in future studies. The incorporation of a physical exam would help  
421 confirm verbal interview findings and strengthen the SOSAS tool.

## 422 REFERENCES

- 423 1. Farmer PE, Kim JYJWjos. Surgery and global health: a view from beyond the OR.  
424 2008;32(4):533-6.
- 425 2. Alkire BC, Raykar NP, Shrima MG, Weiser TG, Bickler SW, Rose JA, et al. Global  
426 access to surgical care: a modelling study. 2015;3(6):e316-e23.
- 427 3. Greenberg SL, Ng-Kamstra JS, Ameh EA, Ozgediz DE, Poenaru D, Bickler SW, editors.  
428 An investment in knowledge: research in global pediatric surgery for the 21st century. Seminars  
429 in pediatric surgery; 2016: Elsevier.
- 430 4. Meara JG, Leather AJM, Hagander L, Alkire BC, Alonso N, Ameh EA, et al. Global  
431 Surgery 2030: evidence and solutions for achieving health, welfare, and economic development.  
432 The Lancet. 2015;386(9993):569-624.
- 433 5. Cherukupalli SE, Bhatia MB, Boeck MA, Blair KJ, Nagarajan N, Gupta S, et al. SOSAS  
434 study in rural India: using accredited social health activists as enumerators. 2019;85(1).
- 435 6. WHA68 RJS-eWHA, Geneva. Strengthening emergency and essential surgical care and  
436 anaesthesia as a component of universal health coverage. 2015;26.
- 437 7. Peltzer KJIP. Injury and social determinants among in-school adolescents in six African  
438 countries. 2008;14(6):381-8.
- 439 8. Butler EK, Tran TM, Fuller AT, Brammell A, Vissoci JR, de Andrade L, et al.  
440 Quantifying the pediatric surgical need in Uganda: results of a nationwide cross-sectional,  
441 household survey. 2016;32(11):1075-85.
- 442 9. Fuller AT, Butler EK, Tran TM, Makumbi F, Luboga S, Muhumza C, et al. Surgeons  
443 overseas assessment of surgical need (SOSAS) Uganda: Update for Household Survey.  
444 2015;39(12):2900-7.
- 445 10. Groen RS, Samai M, Petroze RT, Kamara TB, Yambasu SE, Calland JF, et al. Pilot  
446 testing of a population-based surgical survey tool in Sierra Leone. 2012;36(4):771-4.
- 447 11. Groen RS, Samai M, Stewart K-A, Cassidy LD, Kamara TB, Yambasu SE, et al.  
448 Untreated surgical conditions in Sierra Leone: a cluster randomised, cross-sectional, countrywide  
449 survey. 2012;380(9847):1082-7.
- 450 12. Gupta S, Ranjit A, Shrestha R, Wong EG, Robinson WC, Shrestha S, et al. Surgical  
451 needs of Nepal: pilot study of population based survey in Pokhara, Nepal. 2014;38(12):3041-6.
- 452 13. Mock CN, Abantanga F, Cummings P, Koepsell TDJBotWHO. Incidence and outcome  
453 of injury in Ghana: a community-based survey. 1999;77(12):955.
- 454 14. Petroze RT, Groen RS, Niyonkuru F, Mallory M, Ntaganda E, Joharifard S, et al.  
455 Estimating operative disease prevalence in a low-income country: results of a nationwide  
456 population survey in Rwanda. 2013;153(4):457-64.

- 457 15. Gupta S, Shrestha S, Ranjit A, Nagarajan N, Groen R, Kushner A, et al. Conditions,  
458 preventable deaths, procedures and validation of a countrywide survey of surgical care in Nepal.  
459 2015;102(6):700-7.
- 460 16. Cairo SB, Kalisya LM, Bigabwa R, Rothstein DHJPSI. Characterizing pediatric surgical  
461 capacity in the Eastern Democratic Republic of Congo: results of a pilot study. 2018;34(3):343-  
462 51.
- 463 17. Bank TW. Pakistan 2020 [Available from: <http://data.worldbank.org/country/Pakistan>.  
464 18. Bank TW. Rural Population (% of total population) 2020 [Available from:  
465 <https://data.worldbank.org/indicator/SP.RUR.TOTL.ZS?locations=PK>.  
466 19. Ahmed M, Ali Shah M, Luby S, Drago-Johnson P, Wali SJTM, Health I. Survey of  
467 surgical emergencies in a rural population in the Northern Areas of Pakistan. 1999;4(12):846-57.  
468 20. Blanchard RJ, Blanchard ME, Toussignant P, Ahmed M, Smythe CM. The epidemiology  
469 and spectrum of surgical care in district hospitals of Pakistan. 1987;77(11):1439-45.  
470 21. Talati JJ, Syed NAJWjos. Surgical training programs in Pakistan. 2008;32(10):2156-61.  
471 22. Bureau of Statistics Sindh PDB, Government of Sindh. Sindh Multiple Indicator Cluster  
472 Survey 2018-19: Survey Findings Report 2020 [Available from: [http://sindhbos.gov.pk/wp-](http://sindhbos.gov.pk/wp-content/uploads/2021/03/Sindh-MICS-2018-19-Final-SFR.pdf)  
473 [content/uploads/2021/03/Sindh-MICS-2018-19-Final-SFR.pdf](http://sindhbos.gov.pk/wp-content/uploads/2021/03/Sindh-MICS-2018-19-Final-SFR.pdf).  
474 23. Comission SHR. Districts of Sindh [Available from: [http://www.shrc.org.pk/info-](http://www.shrc.org.pk/info-districts.php)  
475 [districts.php](http://www.shrc.org.pk/info-districts.php).  
476 24. Health Department GoS. PRIMARY HEALTH CARE FACILITIES [Available from:  
477 <https://sindhhealth.gov.pk/Primary>.  
478 25. Health Department GoS. SECONDARY HEALTHCARE FACILITIES [Available from:  
479 <https://www.sindhhealth.gov.pk/Secondary>.  
480 26. Boeck MA, Nagarajan N, Gupta S, Varadaraj V, Groen RS, Shrestha S, et al. Assessing  
481 access to surgical care in Nepal via a cross-sectional, countrywide survey. 2016;160(2):501-8.  
482 27. Siddiqui S, Vervoort D, Peters AW, Shoman H, Ashraf NM, Fatima I, et al. Closing the  
483 gap of children's surgery in Pakistan. 2019;2(1):e000027.  
484 28. Bank TW. Physicians (per 1000 people) 2019 [Available from:  
485 <https://data.worldbank.org/indicator/SH.MED.PHYS.ZS?locations=PK>.  
486 29. Chilopora G, Pereira C, Kamwendo F, Chimbiri A, Malunga E, Bergström SJHrfh.  
487 Postoperative outcome of caesarean sections and other major emergency obstetric surgery by  
488 clinical officers and medical officers in Malawi. 2007;5(1):1-6.  
489 30. Callese TE, Richards CT, Shaw P, Schuetz SJ, Issa N, Paladino L, et al. Layperson  
490 trauma training in low-and middle-income countries: a review. 2014;190(1):104-10.  
491 31. Mock C, Lormand J, Goosen J, Joshipura M, Peden MJGWHOGS. Guidelines for  
492 essential trauma care (2004).  
493 32. Raykar NP, Yorlets RR, Liu C, Greenberg SL, Kotagal M, Goldman R, et al. A  
494 qualitative study exploring contextual challenges to surgical care provision in 21 LMICs.  
495 2015;385:S15.
